# Supplementary material for: Psoriasis Is Associated With Worse Quality of Life Compared With the Other 12 Skin Diseases: A Cross-sectional Study
Source: Research Square preprint supplement (doi:10.21203/rs.3.rs-467746/v1), 2021-05-07
Supplement: Supplementary file 1 [file ebe2d3c29426a092ef13d9aa.docx]

**Table S1 Multivariate analysis of linear regression for DLOI scores in model 3**

| **Variables** | ***β（95%CI）*** | ***P*** |
| --- | --- | --- |
| **Groups** |  |  |
| Non-psoriasis | - |  |
| Psoriasis | 2.030 (1..5761 to 2.483) | <0.001 |
| **Disease severity** |  |  |
| Mild | - | - |
| Moderate | 1.998(1.675 to 2.321) | <0.001 |
| Severe | 5.075(4.605 to 5.544) | <0.001 |
| **Disease duration (years)** | 0.035(0.007 to 0.063) | 0.014 |
| **Sex** |  |  |
| Male | - | - |
| Female | 0.515(0.174 to 0.856) | 0.003 |
| **Age (years)** | 0.029(0.014 to 0.044) | <0.001 |
| **BMI** | 0.002(-0.049 to 0.053) | 0.928 |
| **Marital status** |  |  |
| Unmarried | - | - |
| Married | -0.124(-0.499 to 0.252) | 0.518 |
| **Education** |  |  |
| Primary school and below | - | - |
| High school | 0.352（-0.795 to1.499） | 0.547 |
| College and above | 0.372（-0.705 to 1.450） | 0.498 |
| **Smoking** |  |  |
| No | - | - |
| Yes | 0.427（0.010 to 0.844） | 0.045 |
| **Drinking** |  |  |
| No | - | - |
| Yes | 0.028（-0.366 to 0.422） | 0.889 |
